# Supplementary material for: Targeting of chondrocyte plasticity via connexin43 modulation attenuates cellular senescence and fosters a pro-regenerative environment in osteoarthritis
Source: PubMed Central journal article supplement (PMC6281585; doi:10.1038/s41419-018-1225-2), 2018-12-05
Supplement: 41419_2018_1225_MOESM7_ESM.pdf [file 41419_2018_1225_MOESM7_ESM.pdf]

**Supplementary table 1.**

| <b>Gene name<br/>(protein<br/>name)</b>  | <b>Forward</b>         | <b>Reverse</b>             |
|------------------------------------------|------------------------|----------------------------|
| <i>Cdkn2a</i><br>(p16 <sup>Ink4a</sup> ) | GAGCAGAACGATAGGGCTTG   | CATGTGCCCTCTCCTCCTAA       |
| <i>ALCAM</i><br>(CD166)                  | TTCCAGAACACGATGAGGCA   | GGACAACCTAGGACAGTTTCTCT    |
| <i>GJA1</i><br>(Cx43)                    | ACATGGGTGACTGGAGCGCC   | ATGATCTGCAGGACCCAGAA       |
| <i>HPRT-1</i><br>(HPRT-1)                | TTGAGTTTGGAAACATCTGGAG | GCCCAAAGGGAACTGATAGTC      |
| <i>IL-1β</i><br>(IL-1β)                  | CGAATCTCCGACCACCACTAC  | TCCATGGCCACAACAACACTGA     |
| <i>IL-6</i><br>(IL-6)                    | TGTAGCCGCCCCACACA      | GGATGTACCGAATTTGTTTGTA     |
| <i>MMP-3</i><br>(MMP-3)                  | CCCTGGGTCTCTTCACTCA    | GCTGACAGCATCAAAGGACA       |
| <i>MMP-13</i><br>(MMP-13)                | GGTTCCTGATGTGGGTGAAT   | AGAAGTCGCCATGCTCCTTA       |
| <i>CDH2</i><br>(N-cadherin)              | TATTTCCATCCTGCGTGTGA   | GCGTTTCATCCATACCACAA       |
| <i>PTGS2</i><br>(COX-2)                  | CTTCACGCATCAGTTTTTCAAG | TCACCGTAAATATGATTTAAGTCCAC |
| <i>TWIST1</i><br>(Twist-1)               | CATGTCCGCGTCCCCTACTA   | CACGCCCTGTTTCTTTGAAT       |
| <i>VIM</i><br>(Vimentin)                 | ACTTTGCCGTTGAAGCTG     | AATCCAGATTAGTTTCCCTCAGGT   |
